# Supplementary material for: Acute Effects of Ambient PM2.5 on All-Cause and Cause-Specific Emergency Ambulance Dispatches in Japan
Source: PubMed Central journal article supplement (PMC5858376; doi:10.3390/ijerph15020307), 2018-02-09
Supplement: ijerph-15-00307-s001.pdf [file ijerph-15-00307-s001.pdf]

**Table S1.** Sensitivity analysis using different df on calendar date.

| df | Percent Change (%) | 95% CI              |
|----|--------------------|---------------------|
| 3  | 1.10               | (0.80, 1.39)        |
| 4  | 1.14               | (0.80, 1.47)        |
| 5  | 1.16               | (0.88, 1.43)        |
| 6  | 1.18               | (0.90, 1.45)        |
| 7  | <b>1.20</b>        | <b>(0.86, 1.53)</b> |
| 8  | 1.25               | (0.97, 1.53)        |
| 9  | 1.17               | (0.81, 1.52)        |
| 10 | 1.17               | (0.83, 1.50)        |
| 11 | 1.21               | (0.89, 1.53)        |
| 12 | 1.23               | (0.93, 1.53)        |
| 13 | 1.23               | (0.91, 1.55)        |

Note: Bolded values are from current model.

**Table S2.** Sensitivity analysis using different df on temperature.

| df       | Percent Change (%) | 95% CI              |
|----------|--------------------|---------------------|
| <b>3</b> | <b>1.20</b>        | <b>(0.86, 1.53)</b> |
| 4        | 1.24               | (0.90, 1.58))       |
| 5        | 1.19               | (0.85, 1.52)        |
| 6        | 1.20               | (0.88, 1.51)        |
| 7        | 1.20               | (0.86, 1.53)        |
| 8        | 1.20               | (0.88, 1.51)        |

Note: Bolded values were from current model.

**Table S3.** *p*-values of Tukey's test for environmental variables between cities.

| City    | Environmental Variables | Sendai        | Saitama | Nagoya        | Osaka         | Hiroshima     | Fukuoka       | Kumamoto      |
|---------|-------------------------|---------------|---------|---------------|---------------|---------------|---------------|---------------|
| Sapporo | PM <sub>2.5</sub>       | 0.0640        | <0.0001 | <0.0001       | <0.0001       | <0.0001       | <0.0001       | <0.0001       |
|         | SO <sub>2</sub>         | <0.0001       | <0.0001 | <0.0001       | <0.0001       | <0.0001       | <0.0001       | <0.0001       |
|         | NO <sub>2</sub>         | <0.0001       | <0.0001 | <0.0001       | <0.0001       | <b>0.0002</b> | <0.0001       | <0.0001       |
|         | O <sub>x</sub>          | <b>0.0484</b> | 0.8059  | <0.0001       | 0.0768        | >0.9999       | <b>0.0097</b> | 0.5139        |
|         | Temperature             | <0.0001       | <0.0001 | <0.0001       | <0.0001       | <0.0001       | <0.0001       | <0.0001       |
|         | RH                      | <0.0001       | <0.0001 | <0.0001       | <0.0001       | <0.0001       | <0.0001       | 0.2207        |
| Sendai  | PM <sub>2.5</sub>       | -             | <0.0001 | <0.0001       | <0.0001       | <0.0001       | <0.0001       | <0.0001       |
|         | SO <sub>2</sub>         | -             | <0.0001 | <0.0001       | <0.0001       | <0.0001       | <0.0001       | <0.0001       |
|         | NO <sub>2</sub>         | -             | <0.0001 | <0.0001       | <0.0001       | >0.9999       | 0.9452        | <0.0001       |
|         | O <sub>x</sub>          | -             | 0.9421  | <0.0001       | >0.9999       | 0.2149        | 0.9994        | <b>0.0002</b> |
|         | Temperature             | -             | <0.0001 | <0.0001       | <0.0001       | <0.0001       | <0.0001       | <0.0001       |
|         | RH                      | -             | <0.0001 | <0.0001       | <0.0001       | <0.0001       | <0.0001       | <b>0.0048</b> |
| Saitama | PM <sub>2.5</sub>       | -             | -       | <b>0.0005</b> | 0.7192        | <0.0001       | 0.9989        | 0.7309        |
|         | SO <sub>2</sub>         | -             | -       | <0.0001       | <0.0001       | 0.9508        | <0.0001       | <0.0001       |
|         | NO <sub>2</sub>         | -             | -       | <0.0001       | <b>0.0012</b> | <0.0001       | <0.0001       | <0.0001       |
|         | O <sub>x</sub>          | -             | -       | <0.0001       | 0.9837        | 0.9156        | 0.7340        | <b>0.0435</b> |
|         | Temperature             | -             | -       | 0.2647        | <b>0.0012</b> | <b>0.0001</b> | <b>0.0002</b> | <0.0001       |
|         | RH                      | -             | -       | 0.0675        | <b>0.0005</b> | 0.9920        | 0.9884        | <0.0001       |
| Nagoya  | PM <sub>2.5</sub>       | -             | -       | -             | <0.0001       | <0.0001       | <0.0001       | <0.0001       |
|         | SO <sub>2</sub>         | -             | -       | -             | <0.0001       | <0.0001       | 0.9762        | <0.0001       |

|           |                   |   |                   |                   |                   |                   |
|-----------|-------------------|---|-------------------|-------------------|-------------------|-------------------|
|           | NO <sub>2</sub>   | - | 0.4150            | <b>&lt;0.0001</b> | <b>&lt;0.0001</b> | <b>&lt;0.0001</b> |
|           | O <sub>x</sub>    | - | <b>&lt;0.0001</b> | <b>0.0001</b>     | <b>&lt;0.0001</b> | 0.0957            |
|           | Temperature       | - | 0.4120            | <b>0.0337</b>     | 0.1279            | <b>0.0001</b>     |
|           | RH                | - | 0.7013            | 0.5785            | <b>0.0003</b>     | <b>&lt;0.0001</b> |
| Osaka     | PM <sub>2.5</sub> | - | <b>&lt;0.0001</b> | 0.9390            | >0.9999           |                   |
|           | SO <sub>2</sub>   | - | <b>&lt;0.0001</b> | <b>&lt;0.0001</b> | <b>&lt;0.0001</b> |                   |
|           | NO <sub>2</sub>   | - | <b>&lt;0.0001</b> | <b>&lt;0.0001</b> | <b>&lt;0.0001</b> |                   |
|           | O <sub>x</sub>    | - | 0.3058            | 0.9865            | <b>0.0003</b>     |                   |
|           | Temperature       | - | 0.7967            | 0.9959            | <b>0.0388</b>     |                   |
|           | RH                | - | <b>0.0329</b>     | <b>&lt;0.0001</b> | <b>&lt;0.0001</b> |                   |
| Hiroshima | PM <sub>2.5</sub> | - | <b>&lt;0.0001</b> | <b>&lt;0.0001</b> | <b>0.0037</b>     |                   |
|           | SO <sub>2</sub>   | - | <b>&lt;0.0001</b> | <b>&lt;0.0001</b> | <b>&lt;0.0001</b> |                   |
|           | NO <sub>2</sub>   | - | 0.9831            | <b>&lt;0.0001</b> |                   |                   |
|           | O <sub>x</sub>    | - | 0.0779            | 0.6892            |                   |                   |
|           | Temperature       | - | 0.9896            | 0.8780            |                   |                   |
|           | RH                | - | 0.6664            | <b>&lt;0.0001</b> |                   |                   |
| Fukuoka   | PM <sub>2.5</sub> | - |                   | -                 | 0.9264            |                   |
|           | SO <sub>2</sub>   | - |                   | -                 | <b>&lt;0.0001</b> |                   |
|           | NO <sub>2</sub>   | - |                   | -                 | <b>&lt;0.0001</b> |                   |
|           | O <sub>x</sub>    | - |                   | -                 | <b>&lt;0.0001</b> |                   |
|           | Temperature       | - |                   | -                 | 0.2519            |                   |
|           | RH                | - |                   | -                 | <b>&lt;0.0001</b> |                   |

Note: Significant differences at  $p < 0.005$  are bolded. RH denotes relative humidity.

**Table S4.** Amount of heterogeneity ( $I^2$ ) (%) for each diagnosis at different lags

| <b>Lag structure</b>                 | <b>All cause</b> | <b>Cardiovascular</b> | <b>Respiratory</b> | <b>Cerebrovascular</b> | <b>Neuropsychology</b> |
|--------------------------------------|------------------|-----------------------|--------------------|------------------------|------------------------|
| <b>Unconstrained distributed lag</b> |                  |                       |                    |                        |                        |
| 0                                    | 10.65            | 59.33*                | 2.25               | 1.13                   | 1.40                   |
| 1                                    | 2.24             | 0.00                  | 0.00               | 0.16                   | 0.00                   |
| 2                                    | 48.96            | 0.20                  | 0.00               | 24.82                  | 20.37                  |
| 3                                    | 0.00             | 0.00                  | 0.83               | 0.00                   | 19.66                  |
| 4                                    | 3.38             | 0.00                  | 0.70               | 45.65                  | 0.32                   |
| 5                                    | 0.00             | 0.00                  | 17.42              | 1.74                   | 13.63                  |
| 6                                    | 0.01             | 18.84                 | 4.17               | 0.00                   | 35.96                  |
| 7                                    | 2.03             | 0.00                  | 44.44              | 0.00                   | 0.00                   |
| <b>Average lag</b>                   |                  |                       |                    |                        |                        |
| 0-1                                  | 51.96            | 2.37                  | 1.37               | 34.36                  | 0.00                   |
| 0-3                                  | 74.91*           | 21.61                 | 38.10              | 0.00                   | 35.76                  |
| 0-5                                  | 75.14*           | 0.00                  | 32.20              | 0.00                   | 56.66                  |
| 0-7                                  | 68.94*           | 0.00                  | 20.24*             | 0.00                   | 46.00                  |

\* Statistical significance at  $p < 0.05$ .

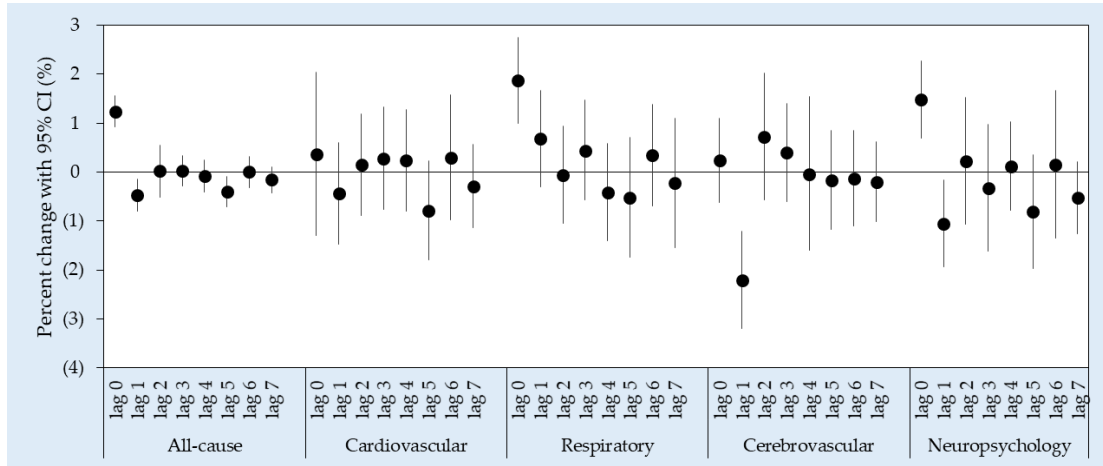

**Figure S1.** Percent change of EAD associated with 10  $\mu\text{g}/\text{m}^3$  increase in  $\text{PM}_{2.5}$  in unconstrained, distributed lag model.
